# Supplementary material for: Dissociation of solid tumor tissues with cold active protease for single-cell RNA-seq minimizes conserved collagenase-associated stress responses
Source: PubMed Central journal article supplement (PMC6796327; doi:10.1186/s13059-019-1830-0), 2019-10-17
Supplement: 13059_2019_1830_MOESM1_ESM.pdf [file 13059_2019_1830_MOESM1_ESM.pdf]

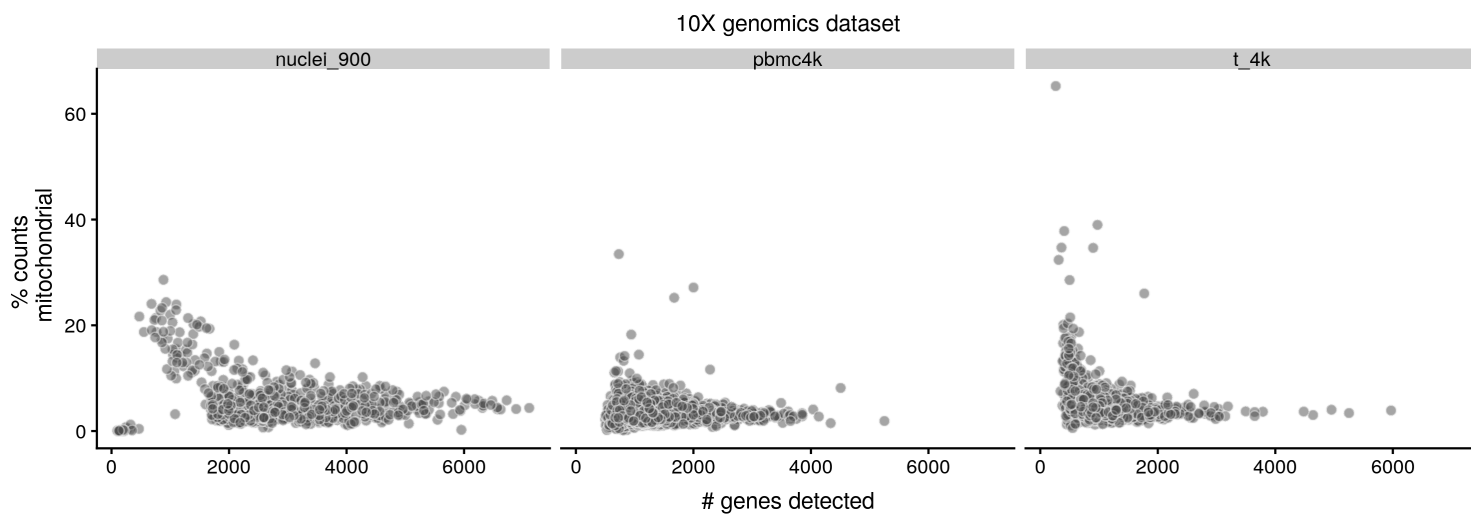

Fig. S1: Mitochondrial gene content of single cells as a function of number of genes detected for three publicly available datasets using the 10X genomics platform (nuclei 900, pbmc4k, t 4). These datasets contain sets of cells with distinctly increased mitochondrial gene content percentages with a lower number of detected genes.

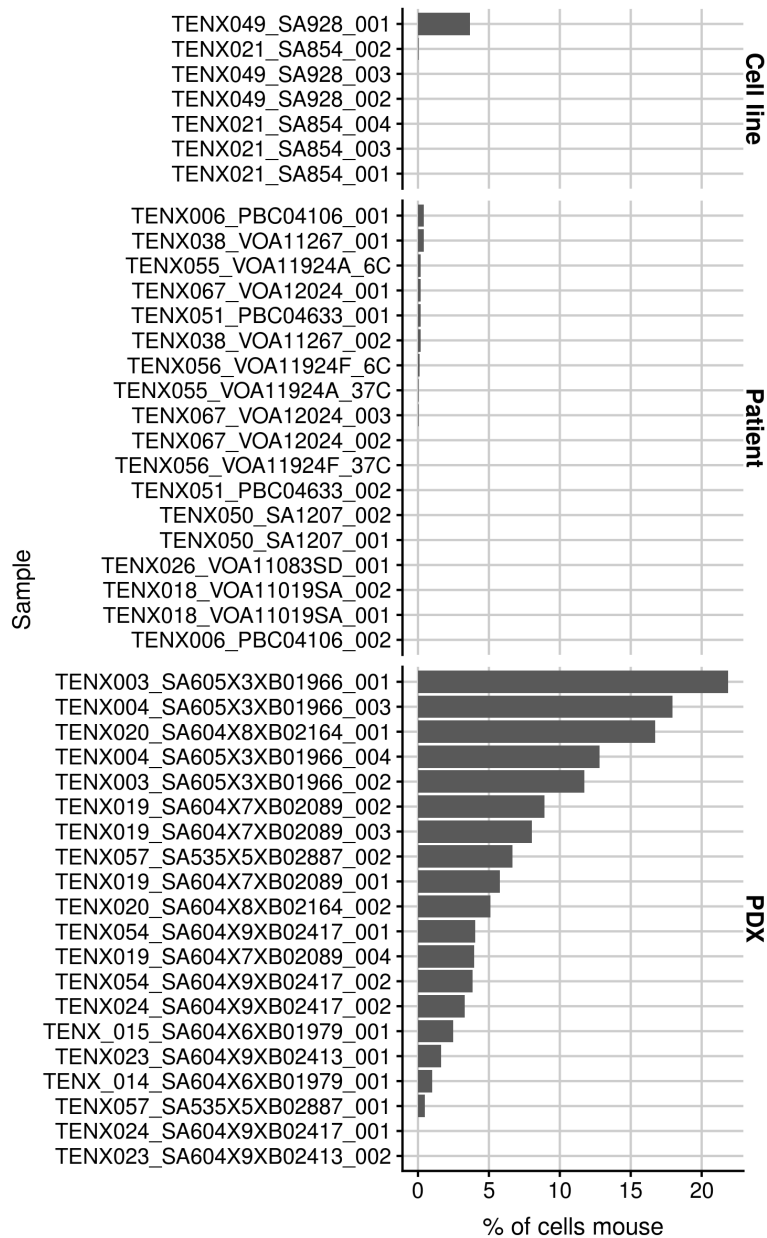

Fig. S2 Percentage of cells identified as mouse across all scRNA-seq samples in the study was highly variable across datasets. While the vast majority were detected in PDX samples, a small number were also detected in cell line and patient primary tumour samples, suggesting either small levels of contamination or a modest false positive rate to the detection method.

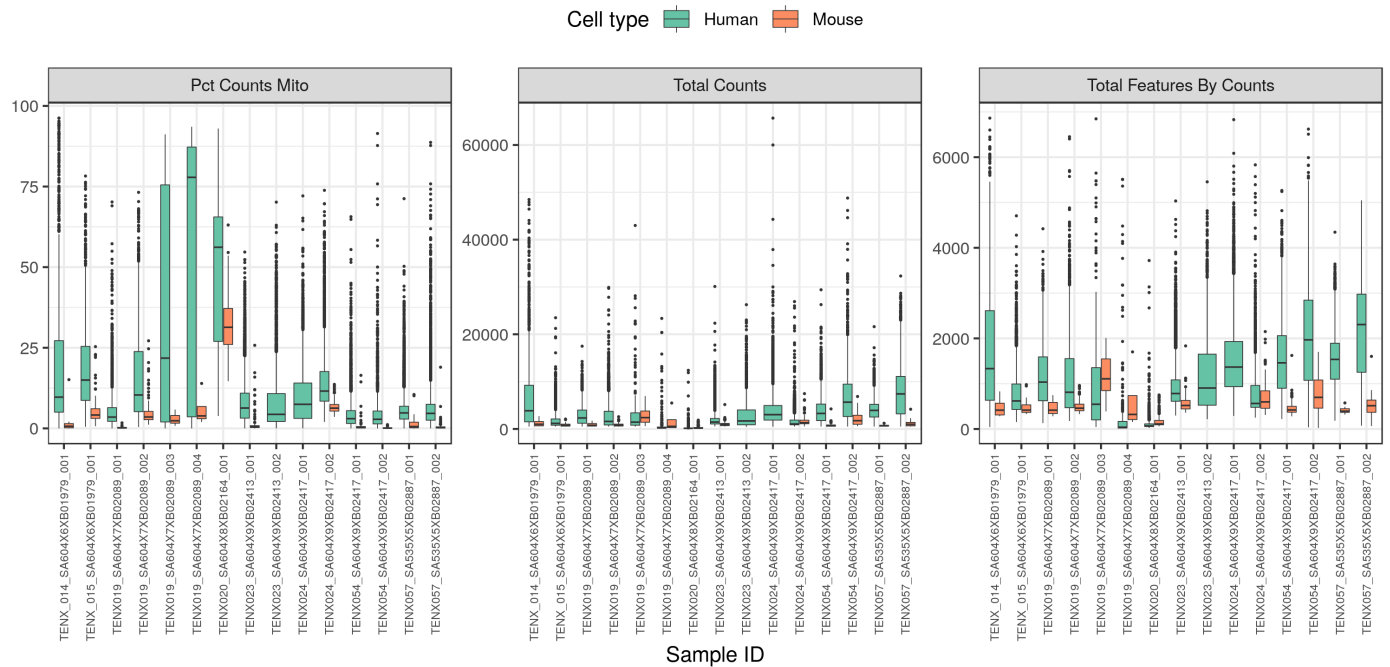

Fig. S3 Quality control metrics (% mitochondrial gene counts, total counts, total genes detected) across all scRNA-seq of PDX included in the study. On average, murine cells score lower across all three metrics though with notable inter-dataset variability.

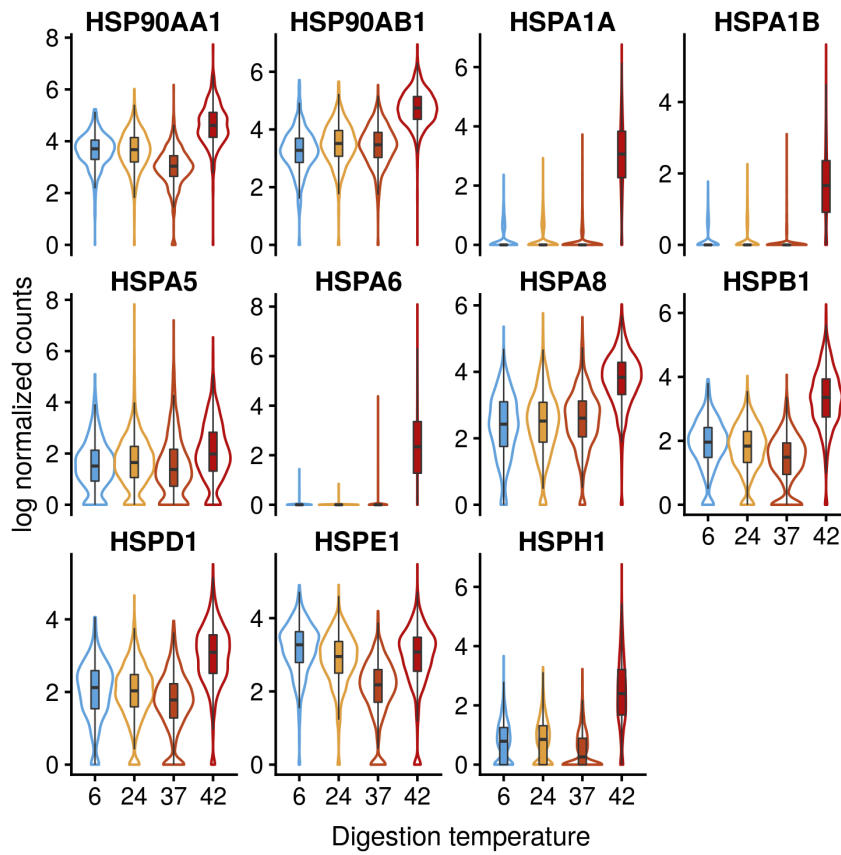

Fig. S4: Heat shock protein (HSP) gene expression across different digestion temperatures in MDA-MB-231 cells.

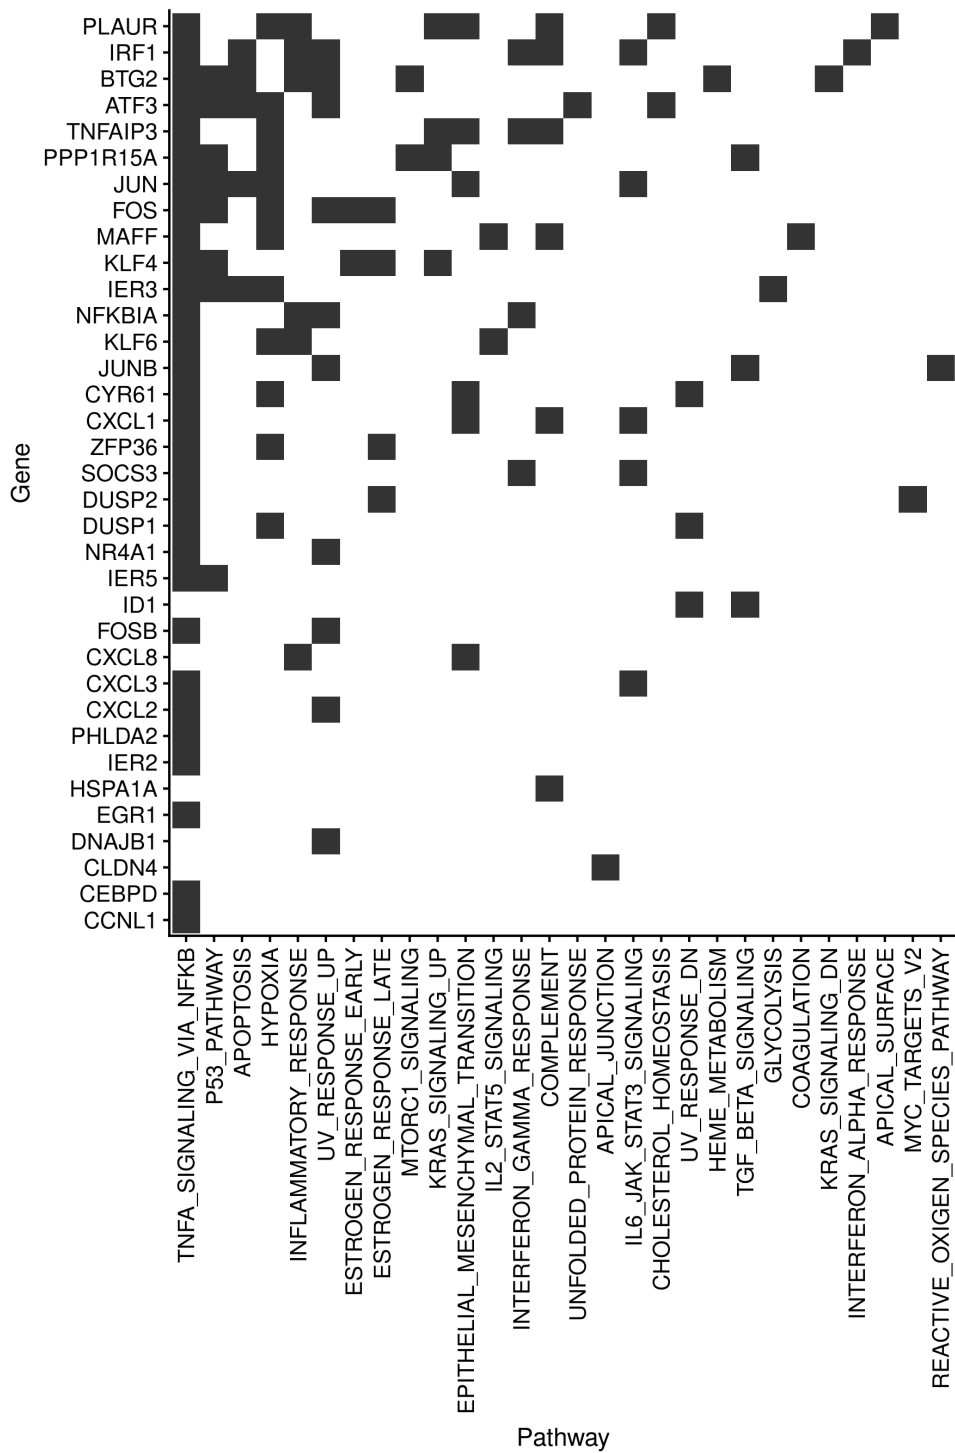

Fig. S5: Pathway membership of top 40 genes (based on log fold change) from the 512 genes in the PDX collagenase-associated core geneset.

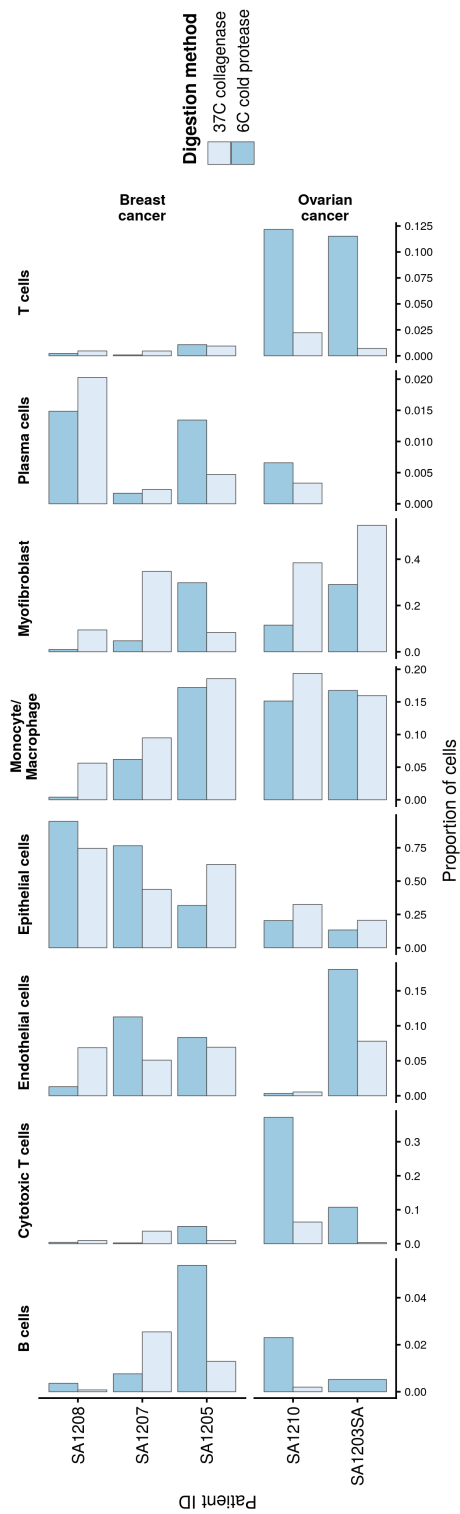

Fig. S6: Microenvironment composition across primary tumour samples digested at 6°C or 37°C. Results show enhanced capture of T cell and cytotoxic T cells in ovarian cancer patient samples, though the composition of the tumour samples was variable, and no consistent difference was observed between conditions in all samples.

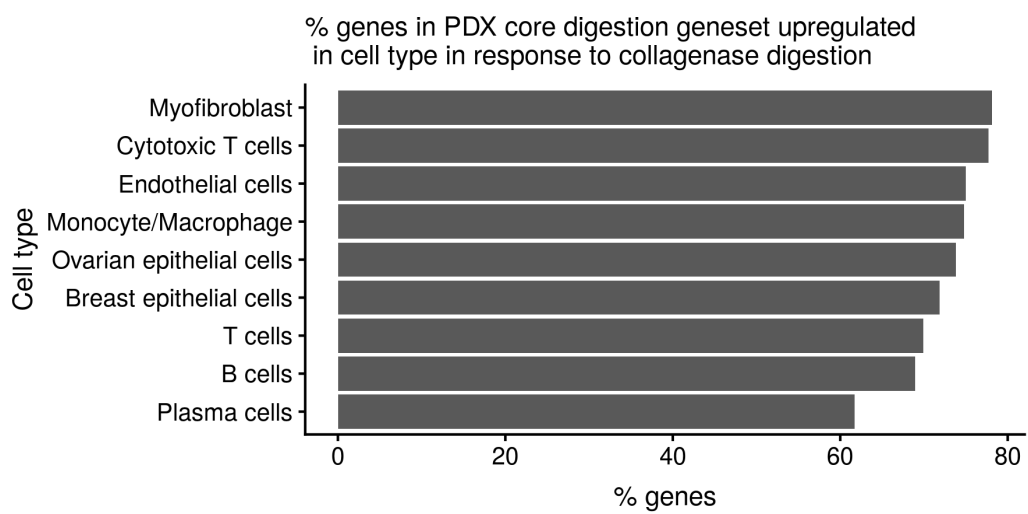

Fig. S7: % of genes identified in the core gene set in PDX that are upregulated in each primary tumour cell type.

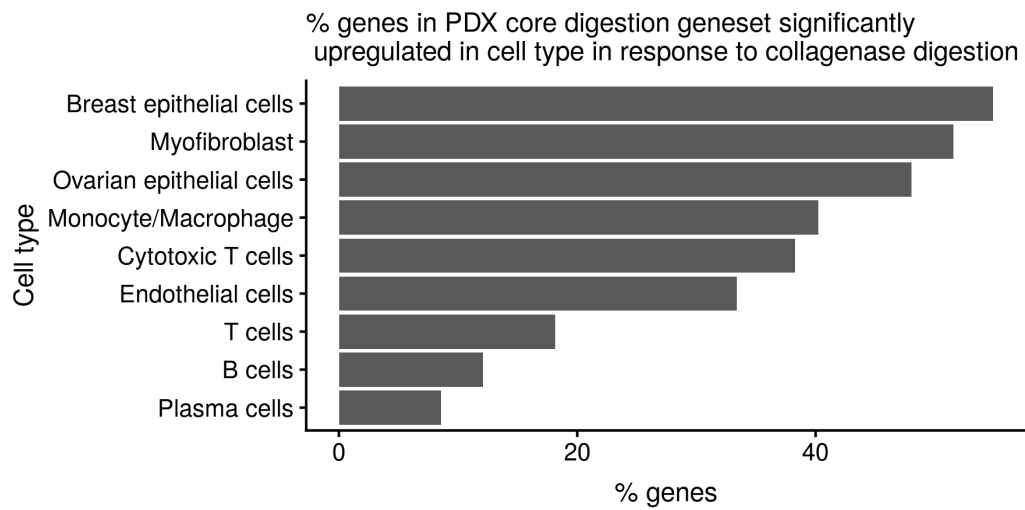

Fig. S8: % of genes identified in the 512 digestion method dependent core gene set in PDX that are significantly upregulated (FDR < 5%) in each primary tumour cell type.



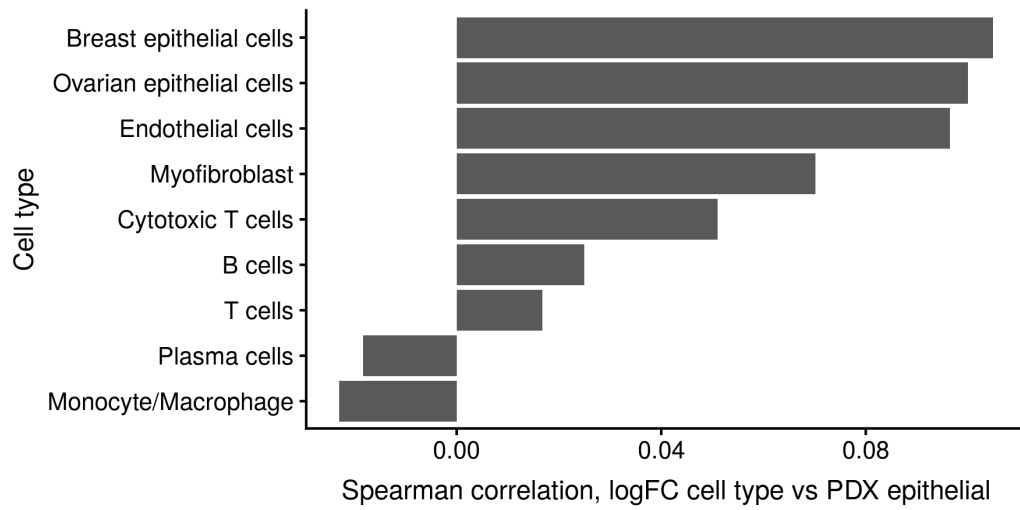

Fig. S9: Spearman correlation between the log fold changes in response to digestion method (37°C collagenase vs 6°C cold protease) in PDX vs. primary tumours of a given cell type.

| Sample Id              | Patient Id | Cancer Type | Cancer Subtype | Digestion Temp | Enzyme        |
|------------------------|------------|-------------|----------------|----------------|---------------|
| TENX018_VOA11019SA_001 | SA1203SA   | Ovarian     | HGSC           | 6 °C           | Cold Protease |
| TENX018_VOA11019SA_002 | SA1203SA   | Ovarian     | HGSC           | 37 °C          | Collagenase   |
| TENX006_PBC04106_001   | SA1205     | Breast      | ER+_PR+_HER2-  | 37 °C          | Collagenase   |
| TENX006_PBC04106_002   | SA1205     | Breast      | ER+_PR+_HER2-  | 6 °C           | Cold Protease |
| TENX050_PBC04573_001   | SA1207     | Breast      | ER+_PR+_HER2-  | 6 °C           | Cold Protease |
| TENX050_PBC04573_002   | SA1207     | Breast      | ER+_PR+_HER2-  | 37 °C          | Collagenase   |
| TENX051_PBC04633_001   | SA1208     | Breast      | ER+_PR+_HER2-  | 6 °C           | Cold Protease |
| TENX051_PBC04633_002   | SA1208     | Breast      | ER+_PR+_HER2-  | 37 °C          | Collagenase   |
| TENX067_VOA12024_001   | SA1210     | Ovarian     | HGSC           | 6 °C           | Cold Protease |
| TENX067_VOA12024_003   | SA1210     | Ovarian     | HGSC           | 37 °C          | Collagenase   |

Table S1: Characteristics of primary tumour samples.

| Cell Type           | Markers                                                                       |
|---------------------|-------------------------------------------------------------------------------|
| B cell              | VIM, MS4A1, CD79A, PTPRC, CD19, BANK1, IGKC, LAPTM5                           |
| Plasma cell         | VIM, CD79A, PTPRC, SDC1, IGKC, IGHG1, IGHG2, LAPTM5                           |
| T cells             | VIM, CD2, CD3D, CD3E, CD3G, CD28, CD4, PTPRC, LAPTM5                          |
| Cytotoxic T cells   | VIM, CD2, CD3D, CD3E, CD3G, CD28, CD8A, GZMA, PRF1, NKG7, PTPRC, GZMB, LAPTM5 |
| Monocyte/Macrophage | VIM, CD14, FCGR3A, CD33, ITGAX, ITGAM, CD4, PTPRC, LYZ, LAPTM5                |
| Breast cancer cells | EPCAM, KRT18, KRT8, KRT19, ESR1                                               |
| Myofibroblast       | VIM, ACTA2, COL1A1, COL3A1, SERPINH1, SDC1                                    |
| Endothelial cells   | VIM, EMCN, CLEC14A, CDH5, PECAM1, VWF, SERPINH1, IL3RA                        |

Table S2: Marker genes used for cell type assignments of breast patient samples.

| Cell Type           | Markers                                                               |
|---------------------|-----------------------------------------------------------------------|
| B cells             | VIM, MS4A1, CD79A, PTPRC, CD19, BANK1, CD24, IGKC                     |
| Plasma cells        | VIM, CD79A, PTPRC, SDC1, IGKC, IGHG1, IGHG2                           |
| T cells             | VIM, CD2, CD3D, CD3E, CD3G, CD28, CD4, PTPRC                          |
| Cytotoxic T cells   | VIM, CD2, CD3D, CD3E, CD3G, CD28, CD8A, GZMA, PRF1, NKG7, PTPRC, GZMB |
| Monocyte/Macrophage | VIM, CD14, FCGR3A, CD33, ITGAX, ITGAM, CD4, PTPRC, LYZ                |
| Epithelial cells    | EPCAM, WFDC2, CD24, CDH1, CLDN3, CLDN4                                |
| Myofibroblast       | VIM, ACTA2, COL1A1, COL3A1, SERPINH1, SDC1                            |
| Endothelial cells   | VIM, EMCN, CLEC14A, CDH5, PECAM1, VWF, SERPINH1, IL3RA                |

Table S3: Marker genes used for cell type assignments of breast patient samples.

| Cell type                | % upregulated | % significantly upregulated |
|--------------------------|---------------|-----------------------------|
| B cells                  | 68.95         | 12.11                       |
| Breast epithelial cells  | 71.88         | 54.88                       |
| Cytotoxic T cells        | 77.73         | 38.28                       |
| Endothelial cells        | 75.00         | 33.40                       |
| Monocyte/Macrophage      | 74.80         | 40.23                       |
| Myofibroblast            | 78.12         | 51.56                       |
| Ovarian epithelial cells | 73.83         | 48.05                       |
| Plasma cells             | 61.72         | 8.59                        |
| T cells                  | 69.92         | 18.16                       |

Table S4: % of the 512 genes in the 37°C, collagenase-associated digestion core geneset identified in PDX samples upregulated and significantly upregulated (5% FDR) in each primary tumour cell type.
